# Supplementary material for: Evaluation of Target Attainment for Tobramycin in Children and Adults with Cystic Fibrosis
Source: MDPI journal article supplement (doi:10.3390/jcm13092641), 2024-04-30

## Supplemental Material

**Supplemental Figure S1.** Volume of distribution of tobramycin over the human-age span receiving 10 mg/kg/day.

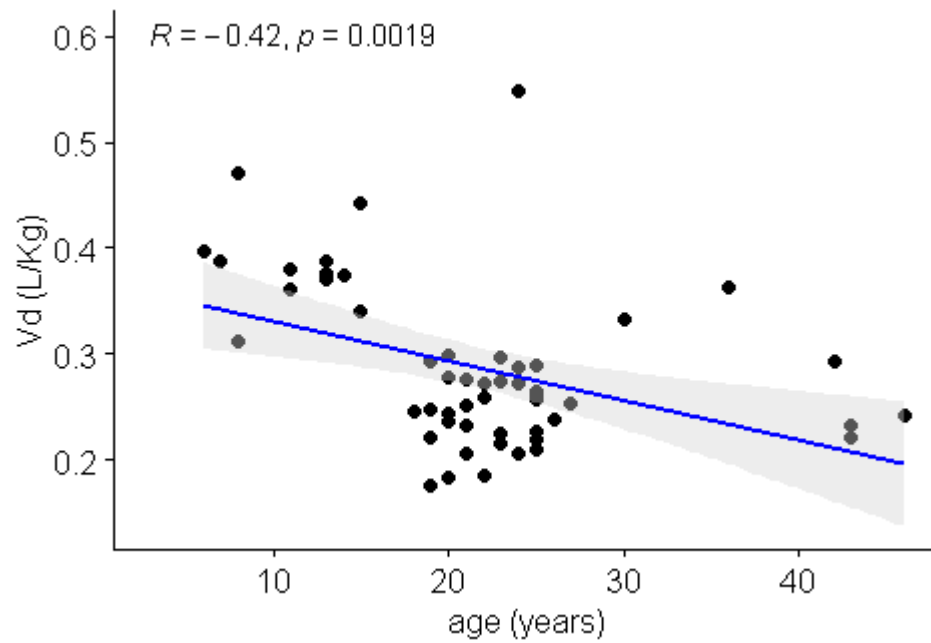

Supplement: s1 [file s1]
